# Supplementary material for: COVID-19 and Cancer: Discovery of Difference in Clinical Immune Indexes
Source: Hindawi journal article supplement (doi:10.1155/2021/8669098), 2021-10-18
Supplement: f2 [file 8669098.f2.pdf]

A

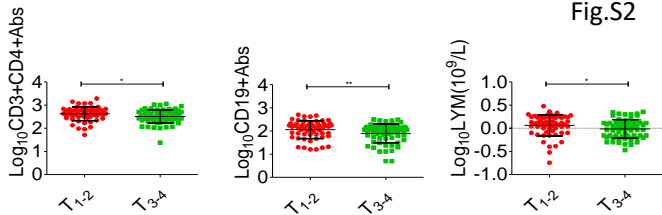

B

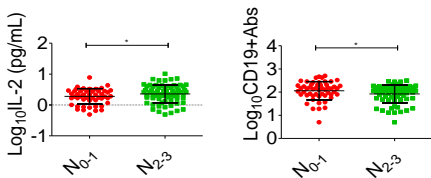

C

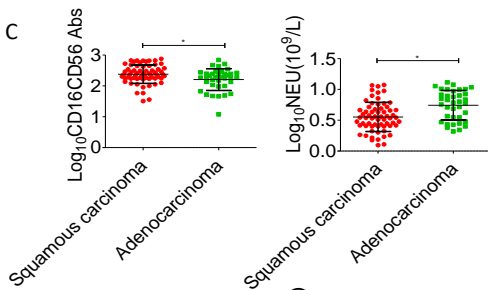

D

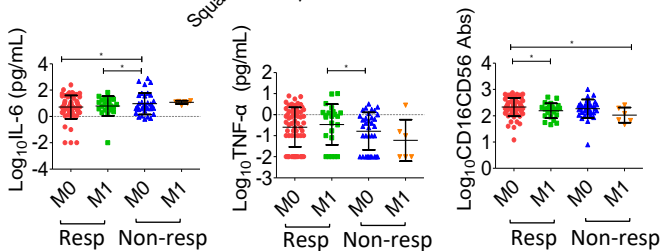

E

| Variables | T <sub>1-2</sub> | T <sub>3-4</sub> | <i>p</i> | N <sub>0-1</sub> | N <sub>2-3</sub> | <i>p</i> | M <sub>0</sub> | M <sub>1</sub> | <i>p</i> |
|-----------|------------------|------------------|----------|------------------|------------------|----------|----------------|----------------|----------|
| Male      | 40               | 53               | 0.146    | 40               | 51               | 0.845    | 72             | 22             | 0.124    |
| Female    | 18               | 13               |          | 13               | 18               |          | 24             | 7              |          |
