# Supplementary material for: COVID-19 and Cancer: Discovery of Difference in Clinical Immune Indexes
Source: Hindawi journal article supplement (doi:10.1155/2021/8669098), 2021-10-18

Fig.S3

## M0 vs M1

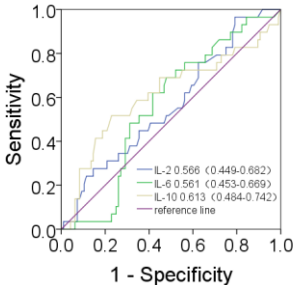

Supplement: f3 [file 8669098.f3.pdf]
